# Supplementary material for: Solvent dependent iodide oxidation in metal-halide perovskite precursor solutions
Source: Royal Society of Chemistry journal article supplement (doi:10.1039/d2cp04266e), 2022-12-29
Supplement: d2cp04266e1.pdf [file d2cp04266e1.pdf]

## Supporting Information

# Solvent Dependent Iodide Oxidation in Metal-Halide Perovskite Precursor Solutions

Eros Radicchi,<sup>a,b</sup>\* Giulia Quaglia,<sup>c,d</sup>\* Loredana Latterini,<sup>c,d</sup> Filippo De Angelis<sup>a,c,e</sup>

<sup>a</sup> Computational Laboratory for Hybrid/Organic Photovoltaics (CLHYO), Istituto CNR di Scienze e Tecnologie Chimiche “Giulio Natta” (CNR-SCITEC), via Elce di Sotto 8, Perugia, I-06123, Italy.

<sup>b</sup> Nanomaterials Research Group, Department of Biotechnology, University of Verona, Strada Le Grazie 15, I-37134, Verona, Italy.

<sup>c</sup> Department of Chemistry, Biology and Biotechnology, University of Perugia, via Elce di Sotto 8, Perugia, I-06123, Italy.

<sup>d</sup> Nano4Light-Lab, via Elce di Sotto, Perugia, I-06123, Italy.

<sup>e</sup> Department of Natural Sciences & Mathematics, College of Sciences & Human Studies, Prince Mohammad Bin Fahd University, Al Khobar 31952, Saudi Arabia.

## Section S1. Kinetics behavior of KI solutions in GBL

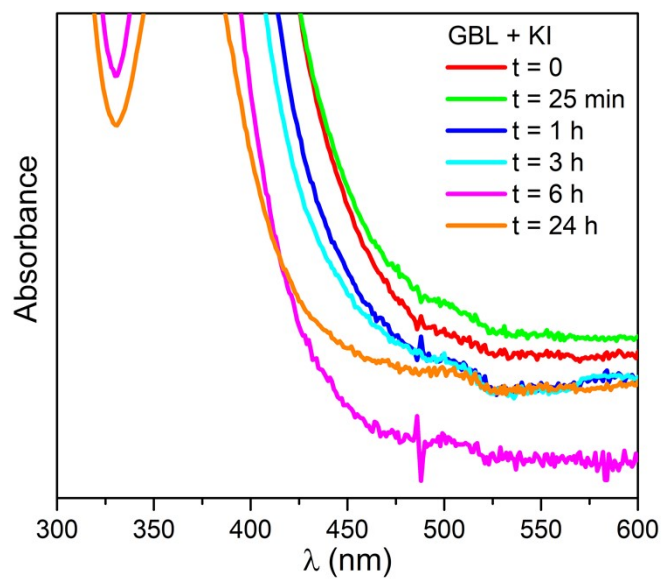

**Figure S1.** Absorption spectra of KI  $10^{-1}$  M in GBL recorded at different time, with a magnification on the 300-600 nm region. The shoulder around 500 nm suggest the presence of polyiodides such as  $I_5^-$  and  $I_7^-$ .

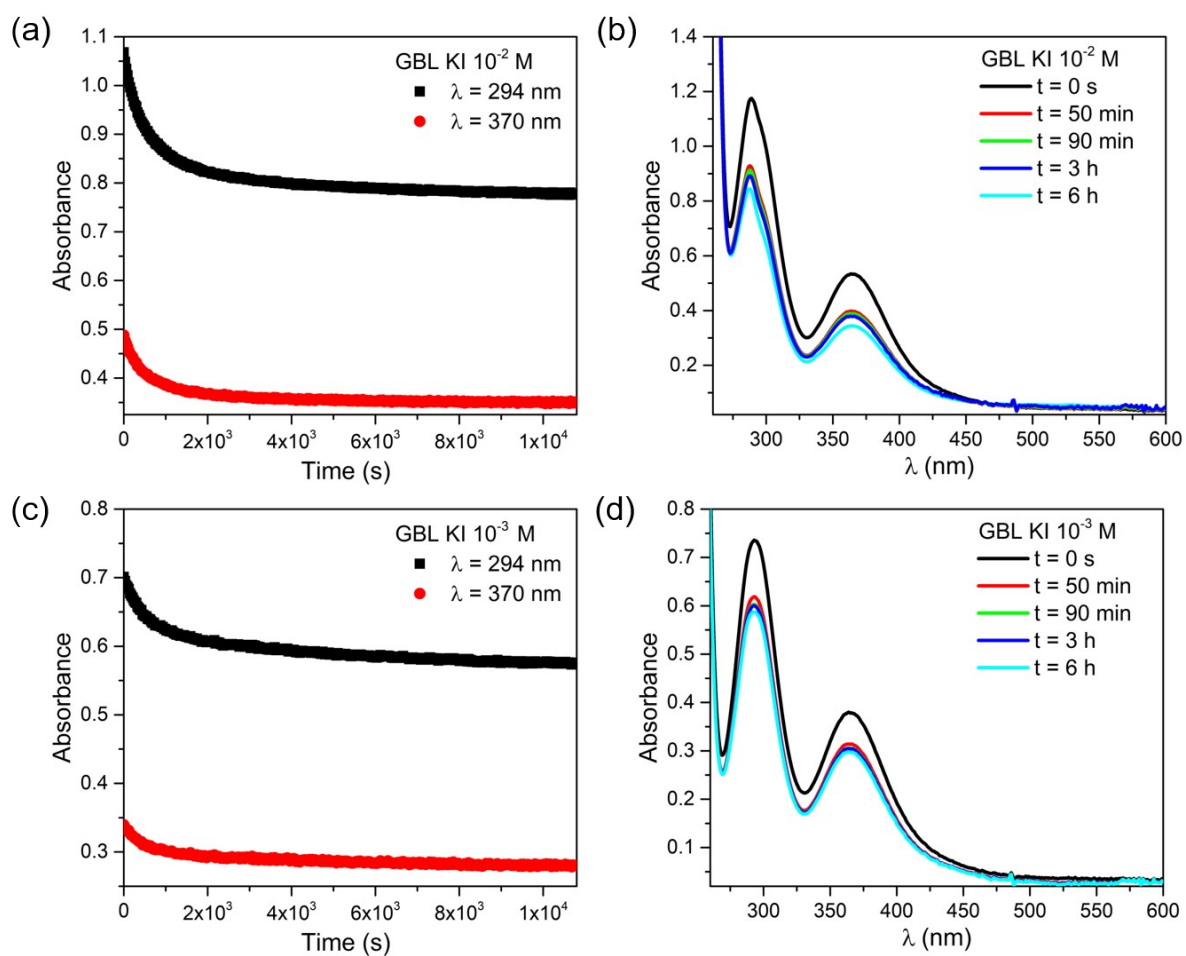

**Figure S2.** Absorbance intensity - time profile and absorption spectra of KI GBL solutions a, b)  $10^{-2}$  M and c, d)  $10^{-3}$  M.

| [KI]        | $y_0$               | $A_1$             | $\tau_1$ (s) | $R^2$ |
|-------------|---------------------|-------------------|--------------|-------|
| $10^{-2}$ M | $0.8073 \pm 0.0006$ | $0.236 \pm 0.002$ | $690 \pm 10$ | 0.99  |
| $10^{-3}$ M | $0.6008 \pm 0.0004$ | $0.095 \pm 0.001$ | $699 \pm 13$ | 0.99  |

**Table S1.** Fitting parameters for the  $y = A_1 * \exp(-x/\tau_1) + y_0$  monoexponential fit for kinetics of KI  $10^{-2}$  and  $10^{-3}$  M in GBL.

## Section S2. Determination of molar absorption coefficient of $I_3^-$ in GBL

To estimate the molar absorption coefficients ( $\epsilon$ ) of  $I_3^-$  in GBL, we prepared a 0.104 M KI solution in GBL and waited 3 hours to measure its absorption spectrum, Figure S3a, according to our results on kinetic measurements of diluted KI solutions in GBL (see main text). Then, we dropped small amounts of this solution, *i.e.* 100, 200 and 300  $\mu$ L, in 2 mL of water, where the  $\epsilon$  is well-known (see main text), and we registered the corresponding absorption spectra, Figure S3b.

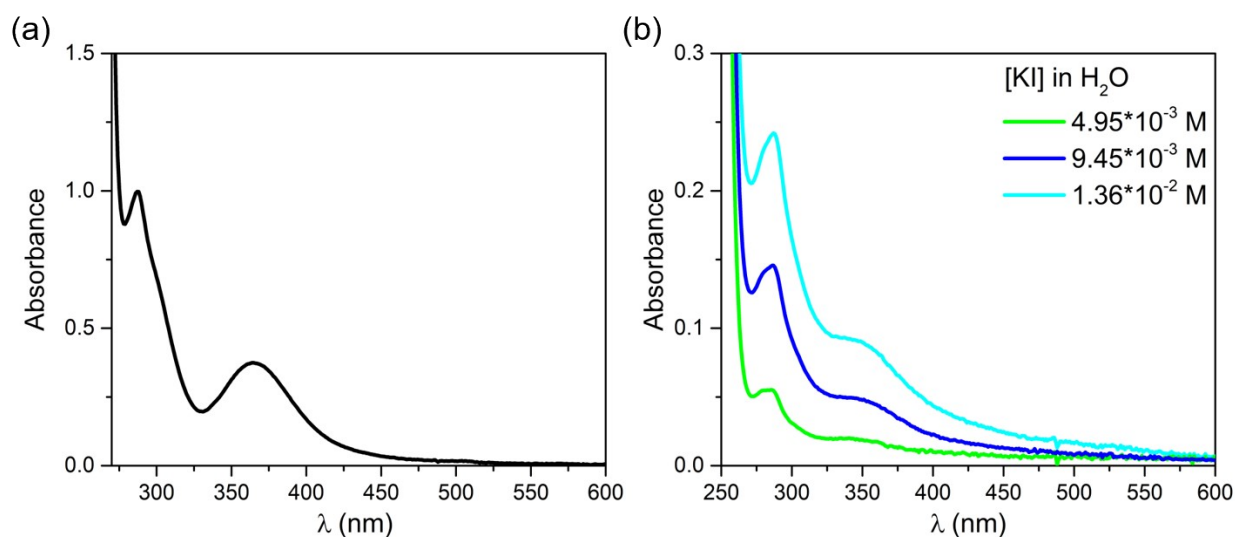

**Figure S3.** Absorption spectra of a) 0.104 M KI solution in GBL after 3 hours from its preparation and b) its dilutions in water.

Considering these values, from the typical absorption peaks of  $I_3^-$  in water, *i.e.* 288 and 353 nm, we estimated its concentration. Then, with a simple dilution calculation ( $C_i V_i = C_f V_f$ , where  $C$  and  $V$  stand for concentration and volume, respectively, and the subscripts  $i$  and  $f$  mean “initial” and “final”, respectively) we calculated the concentration of  $I_3^-$  that is supposed to be present in the mother GBL solution, Table S2. Being the  $I_3^-$  dissociation in water larger than in organic solvents,<sup>1</sup> we reasonably expect the  $I_3^-$  concentration to be higher in GBL and, therefore, the reported values should be considered as an upper limit with respect to the real

case. From the average of these concentrations,  $5.96 \times 10^{-5}$  M, and taking the absorbance values from the 0.104 M KI solution spectrum of Figure S3a, we finally estimated the  $\epsilon$  of  $I_3^-$  in GBL, Figure S4.

| Sample            | $A_{288 \text{ nm}}$ | $[I_3^-]$ diluted solution (M) | $[I_3^-]$ mother solution (M) | $A_{353 \text{ nm}}$ | $[I_3^-]$ diluted solution (M) | $[I_3^-]$ mother solution (M) |
|-------------------|----------------------|--------------------------------|-------------------------------|----------------------|--------------------------------|-------------------------------|
| 100 $\mu\text{L}$ | 0.053                | $2.65 \times 10^{-6}$          | $5.57 \times 10^{-5}$         | 0.018                | $1.36 \times 10^{-6}$          | $2.86 \times 10^{-5}$         |
| 200 $\mu\text{L}$ | 0.144                | $7.20 \times 10^{-6}$          | $7.92 \times 10^{-5}$         | 0.047                | $3.56 \times 10^{-6}$          | $3.92 \times 10^{-5}$         |
| 300 $\mu\text{L}$ | 0.241                | $1.21 \times 10^{-5}$          | $9.28 \times 10^{-5}$         | 0.088                | $6.67 \times 10^{-6}$          | $5.11 \times 10^{-5}$         |

**Table S2.** Absorbance and concentrations of KI solutions in GBL diluted in water and corresponding calculated concentrations in the mother solutions.

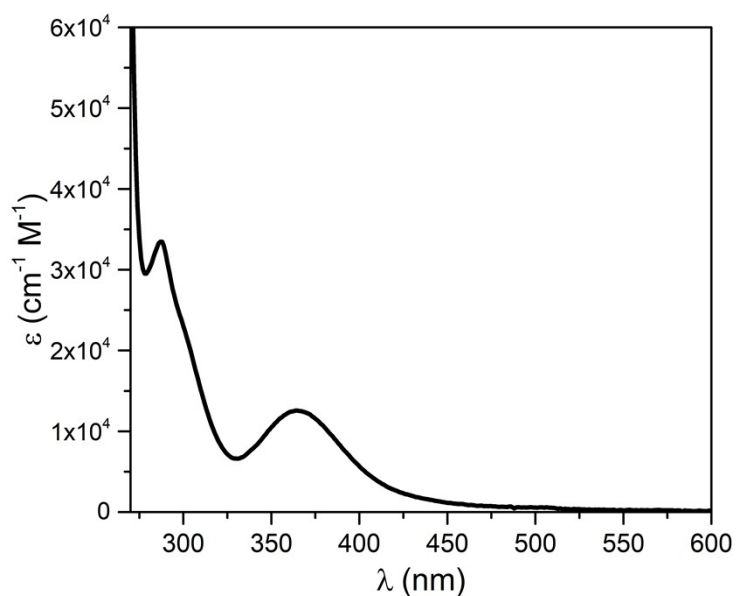

**Figure S4.** Estimated molar absorption coefficients ( $\epsilon$ ) of  $I_3^-$  in GBL.

### Section S3. Factors influencing the oxidation of I<sup>-</sup>

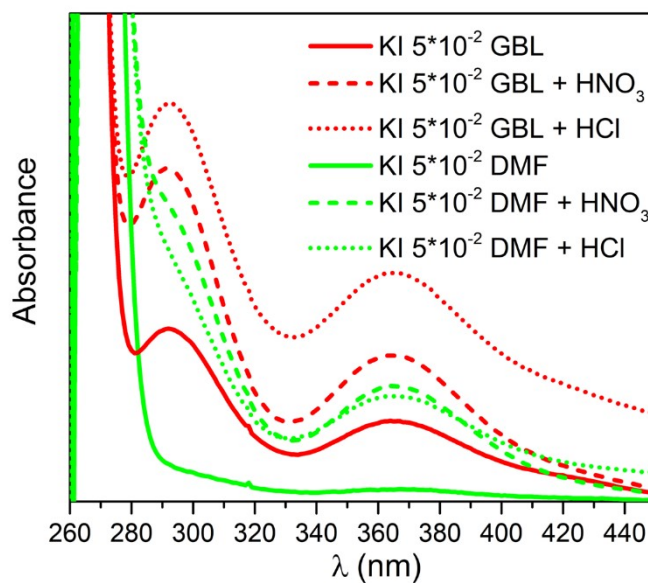

**Figure S5.** Absorption spectra of KI  $5 \times 10^{-2}$  M in DMF and GBL with and without addition of 1% v/v of  $5 \times 10^{-2}$  M aqueous solutions of acids (HCl, HNO<sub>3</sub>).

| Solvent | pH (estimated) | pKa [ref. 2] |
|---------|----------------|--------------|
| DMSO    | 6-7            | 31,0         |
| DMF     | 6              | 38,0         |
| GBL     | 4-5            | 24,3         |
| ACN     | 5-6            | 24,9         |

**Table S3.** pH values estimated from litmus paper measurements and calculated pKa of the employed solvents.

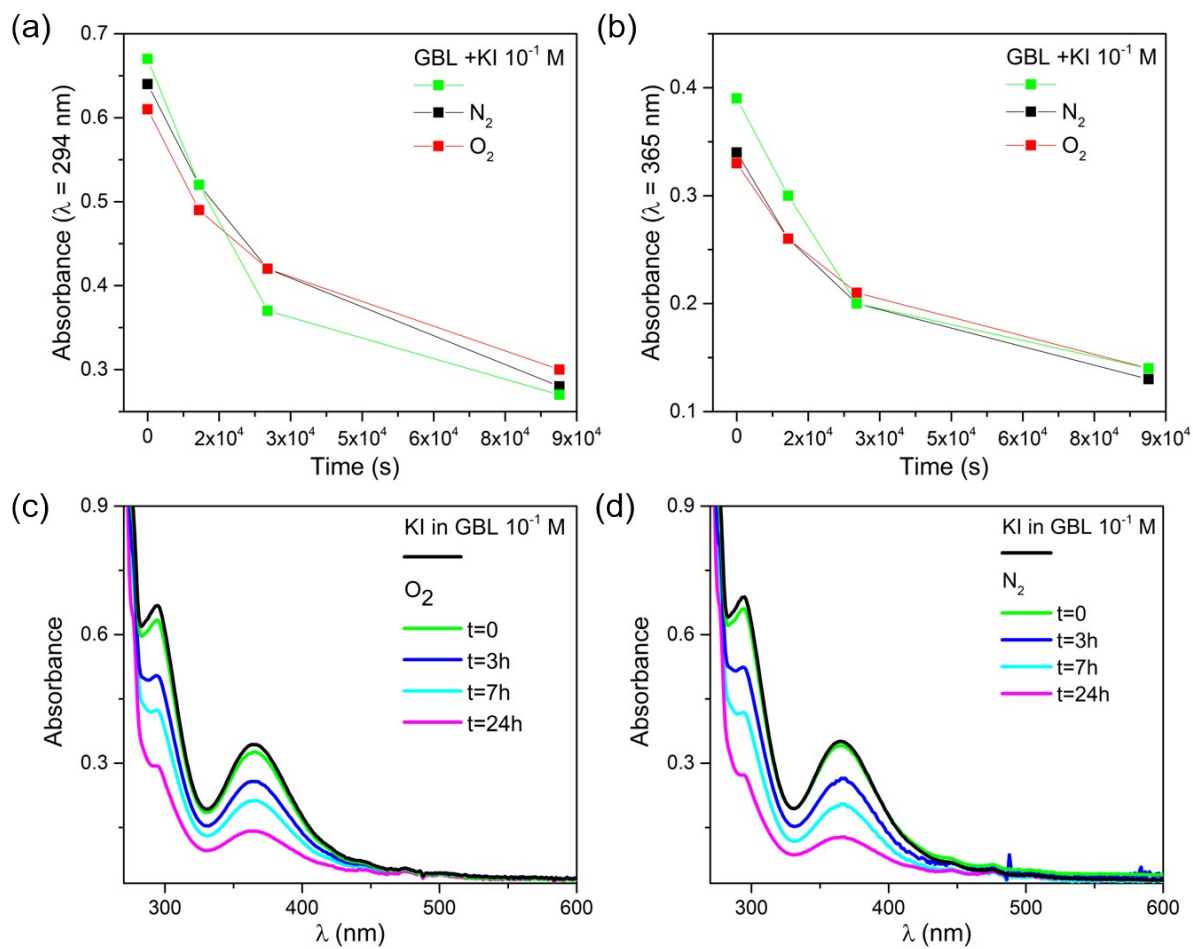

**Figure S6.** Effect of O<sub>2</sub> and N<sub>2</sub> in the absorption spectra of KI 0.1 M in GBL. Absorption data at different recording time for KI 0.1 M in GBL as is, saturated with N<sub>2</sub> and with O<sub>2</sub> at a) 294 nm and b) 365 nm; absorption spectra of KI 0.1 M in GBL at different time (c for O<sub>2</sub> and d for N<sub>2</sub>).

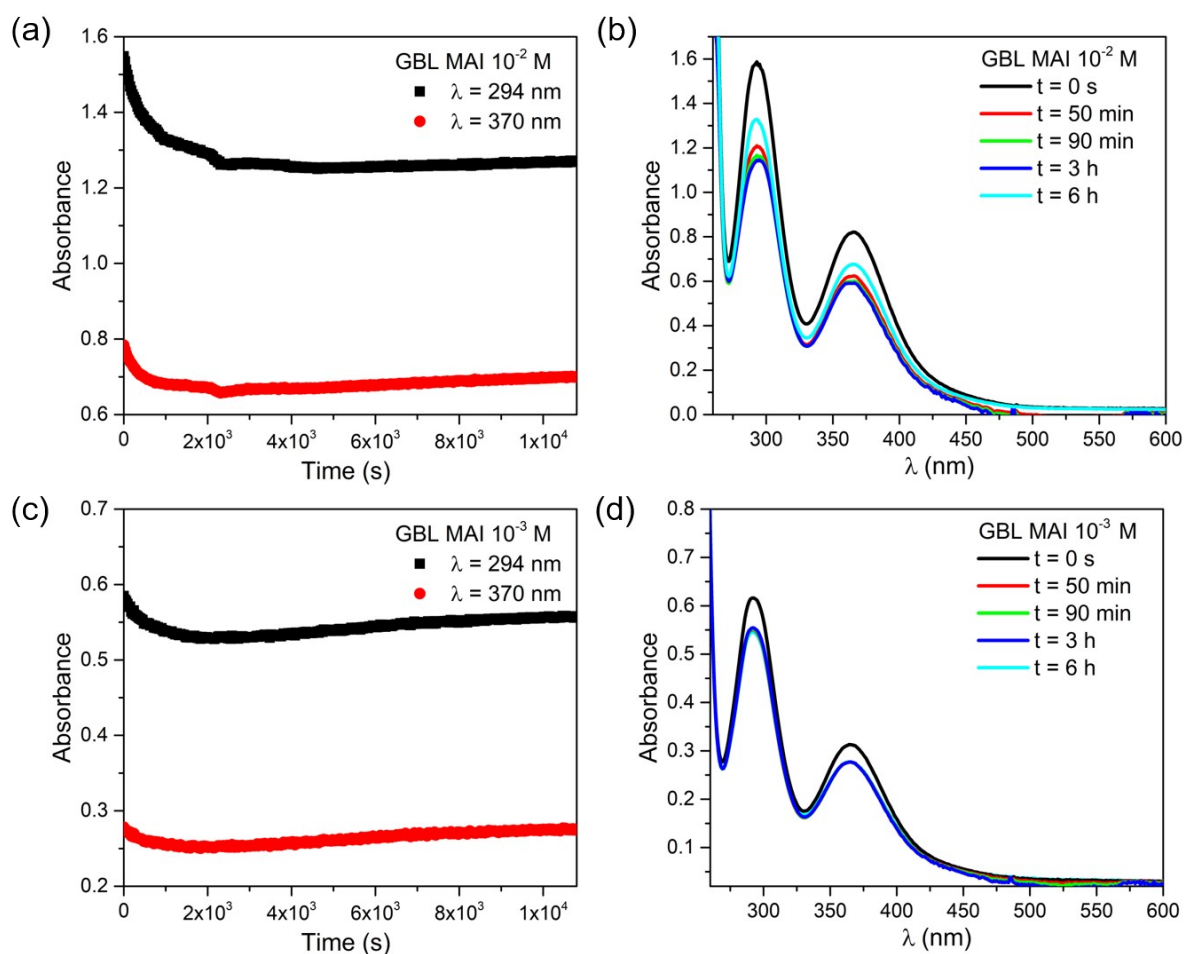

**Figure S7.** Absorbance intensity - time profile and absorption spectra of MAI GBL solutions a, b)  $10^{-2}$  M and c, d)  $10^{-3}$  M.

## References

- (1) Baucke, F. G. K.; Bertram, R.; Cruse, K. The Iodide-Iodine System in Acetonitrile: Evaluation of Standard Thermodynamic Data on the Association  $I^- + I_2 \rightarrow I_3^-$  from Potentiometric Measurements at 25 and 50°C. *Journal of Electroanalytical Chemistry and Interfacial Electrochemistry* **1971**, *32* (2), 247–256. [https://doi.org/10.1016/S0022-0728\(71\)80190-0](https://doi.org/10.1016/S0022-0728(71)80190-0).
- (2) Marvin version 22.22, ChemAxon (<https://www.chemaxon.com>)
